# Supplementary material for: Synthesis and characterization of positively capped CdTe quantum wires that exhibit strong luminescence in aqueous media
Source: Royal Society of Chemistry journal article supplement (doi:10.1039/b615657f), 2007-01-01
Supplement: b615657f.pdf [file b615657f.pdf]

## Supplementary Data

### Instruments

TEM images were recorded with a PHILIPS CM 300 UT High-Resolution Transmission Electron Microscope (300 kV acceleration voltage, 0.172 nm point resolution – Scherzer focus) equipped with a 2 camera system (TV System and CCD camera). Samples for TEM were prepared by casting one drop of the CdTe sample solution onto a standard formvar film on copper grid (230 meshes).

Energy disperse spectroscopy (EDS) data were obtained with PHILIPS CM 30 T/STEM Analytical Electron Microscope (300 kV acceleration voltage, 0.172 nm point resolution – Scherzer focus) equipped with a scanning unit (STEM), Oxford Instruments ISIS 300 EDX System).

Power X-ray diffraction (XRD) measurement was performed with a PHILIPS X'Pert Pro MPD Powder X-Ray Diffractometer (U = 40 kV, I = 35 mA, line focus  $15^\circ < 2\theta < 50^\circ$ , Cu K $\alpha$  (1.541 nm) radiation).

UV-Vis absorption spectra were taken with a PERKIN ELMER UV/VIS Spectrometer Lambda 2 (190 to 1100 nm, double beam).

Luminescence spectra data were obtained from a HORIBA FluoroMax®-3 (Fluorometer): all measurements were performed at 20.0 °C.

Confocal images were recorded with a LEICA TCS SP II Confocal Laser Scanning Microscope (CLSM) (excitation wavelength 405 nm and 488 nm).

### Acknowledgements

The electron microscopy measurements were carried out in the Central Facility for High Resolution Electron Microscopy of Friedrich-Alexander University (FAU) Erlangen-Nürnberg, Germany. Confocal microscopy was carried out in the department of Molecular Plant Physiology, FAU Erlangen-Nürnberg, Germany. Powder pattern was measured at the Chair for Crystallography and Structural Physics, FAU Erlangen-Nürnberg, Germany.

## Figures

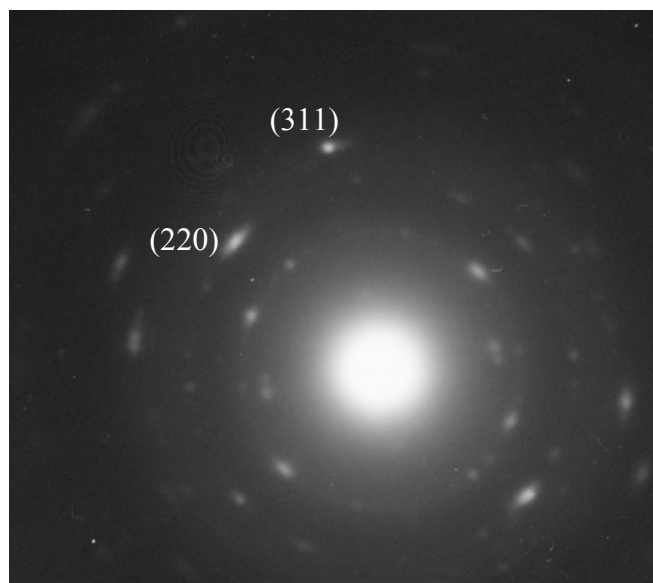

**Fig. S1:** SAED pattern of CdTe QR (8 h reaction time) showing cubic zinc blende crystal structure.

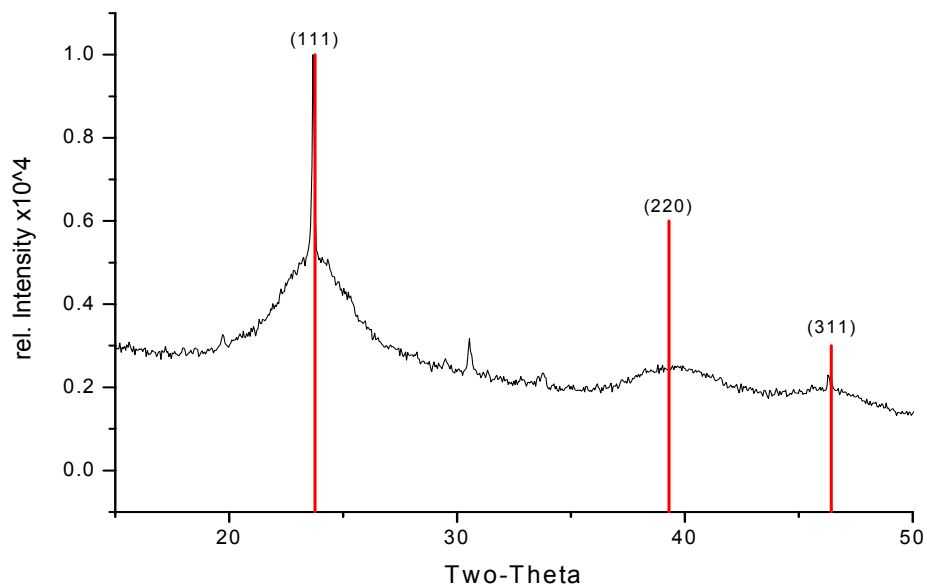

**Fig. S2:** Powder x-ray diffractogram of CdTe QR demonstrating their cubic zinc blende crystallinity. The line spectra ( $23.72^\circ$ ,  $39.3^\circ$  and  $46.4^\circ$ ) indicates the bulk CdTe reflections with their relative intensities according to the PDF-Database.
